# Supplementary material for: Measuring antibody avidity to Plasmodium falciparum merozoite antigens using a multiplex immunoassay approach
Source: PubMed Central journal article supplement (PMC7195780; doi:10.1186/s12936-020-03243-3), 2020-05-01
Supplement: 12936_2020_3243_MOESM2_ESM.pdf [file 12936_2020_3243_MOESM2_ESM.pdf]

Figure S2:

Similar Avidity Indexes (AI) are Obtained using

Different Dilutions of Plasma

| <b>&gt;20,000 MFI with dilution</b> |          |         |         |            |
|-------------------------------------|----------|---------|---------|------------|
|                                     | Dilution | no salt | 1M salt | AI         |
| AMA1                                | 1:100    | 23623   | 22283   | 94%        |
|                                     | 1:500    | 18769   | 17652   | 94%        |
|                                     | 1:1000   | 15428   | 13729   | 89%        |
|                                     |          |         | Average | <b>92%</b> |
|                                     |          |         | SD      | <b>3%</b>  |
| EBA-175                             | 1:100    | 22457   | 22650   | 101%       |
|                                     | 1:500    | 19382   | 18519   | 96%        |
|                                     | 1:1000   | 15286   | 14233   | 93%        |
|                                     |          |         | Average | <b>97%</b> |
|                                     |          |         | SD      | <b>4%</b>  |

| <b>15,000 - 20,000 MFI with Dilution</b> |          |         |         |            |
|------------------------------------------|----------|---------|---------|------------|
|                                          | Dilution | no salt | 1M salt | AI         |
| MSP1                                     | 1:100    | 16314   | 15464   | 95%        |
|                                          | 1:500    | 11037   | 9008    | 82%        |
|                                          | 1:1000   | 6625    | 5736    | 87%        |
|                                          |          |         | Average | <b>88%</b> |
|                                          |          |         | SD      | <b>5%</b>  |
| MSP3                                     | 1:100    | 17294   | 15894   | 92%        |
|                                          | 1:500    | 8049    | 6984    | 87%        |
|                                          | 1:1000   | 5332    | 4506    | 85%        |
|                                          |          |         | Average | <b>88%</b> |
|                                          |          |         | SD      | <b>4%</b>  |
| AMA1                                     | 1:100    | 1:100   | 1:100   | 85%        |
|                                          | 1:500    | 1:500   | 1:500   | 75%        |
|                                          | 1:1000   | 4921    | 3840    | 78%        |
|                                          |          |         | Average | <b>79%</b> |
|                                          |          |         | SD      | <b>5%</b>  |

**10,000 - 15,000 MFI with Dilution**

|         | Dilution | no salt | 1M salt | AI         |
|---------|----------|---------|---------|------------|
| EBA-175 | 1:100    | 12169   | 10750   | 88%        |
|         | 1:500    | 6990    | 6296    | 90%        |
|         | 1:1000   | 4503    | 4066    | 90%        |
|         |          |         | Average | <b>90%</b> |
|         |          |         | SD      | <b>1%</b>  |
| MSP-1   | 1:100    | 11064   | 1260    | 11%        |
|         | 1:500    | 5081    | 420     | 8%         |
|         | 1:1000   | 2549    | 215     | 8%         |
|         |          |         | Average | <b>9%</b>  |
|         |          |         | SD      | <b>2%</b>  |
| MSP2    | 1:100    | 12042   | 4343    | 36%        |
|         | 1:500    | 5611    | 2008    | 36%        |
|         | 1:1000   | 4660    | 1833    | 39%        |
|         |          |         | Average | <b>37%</b> |
|         |          |         | SD      | <b>2%</b>  |

| <b>5,000 - 10,000 MFI with Dilution</b> |          |         |         |            |
|-----------------------------------------|----------|---------|---------|------------|
|                                         | Dilution | no salt | 1M salt | AI         |
| MSP1                                    | 1:100    | 8891    | 7550    | 85%        |
|                                         | 1:500    | 5237    | 3993    | 76%        |
|                                         | 1:1000   | 3796    | 2938    | 77%        |
|                                         |          |         | Average | <b>80%</b> |
|                                         |          |         | SD      | <b>5%</b>  |
| MSP3                                    | 1:100    | 5791    | 659     | 11%        |
|                                         | 1:500    | 1533    | 117     | 8%         |
|                                         | 1:1000   | 954     | 95      | 10%        |
|                                         |          |         | Average | <b>10%</b> |
|                                         |          |         | SD      | <b>2%</b>  |

| <b>1,000 - 5,000 MFI with Dilution</b> |          |         |         |            |
|----------------------------------------|----------|---------|---------|------------|
|                                        | Dilution | no salt | 1M salt | AI         |
| MSP3                                   | 1:100    | 4054    | 790     | 19%        |
|                                        | 1:500    | 1172    | 172     | 15%        |
|                                        | 1:1000   | 747     | 102     | 14%        |
|                                        |          |         | Average | <b>16%</b> |
|                                        |          |         | SD      | <b>3%</b>  |

|         |        |      |         |            |
|---------|--------|------|---------|------------|
| EBA-175 | 1:100  | 2778 | 1738    | 63%        |
|         | 1:500  | 1216 | 787     | 65%        |
|         | 1:1000 | 689  | 369     | 54%        |
|         |        |      | Average | <b>60%</b> |
|         |        |      | SD      | <b>6%</b>  |
