# Supplementary material for: Measuring antibody avidity to Plasmodium falciparum merozoite antigens using a multiplex immunoassay approach
Source: PubMed Central journal article supplement (PMC7195780; doi:10.1186/s12936-020-03243-3), 2020-05-01

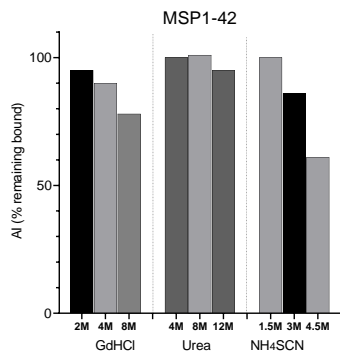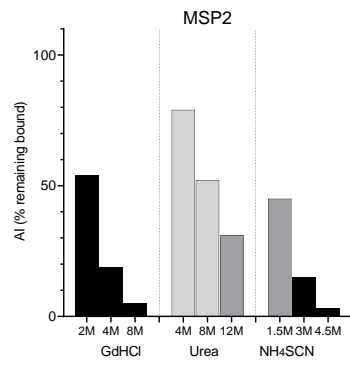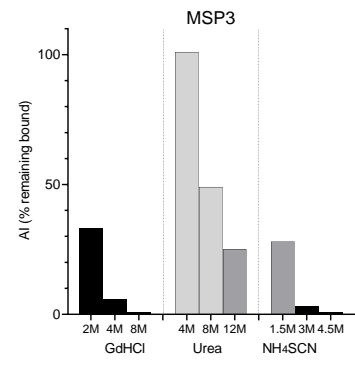

Supplement: 12936_2020_3243_MOESM3_ESM.pdf [file 12936_2020_3243_MOESM3_ESM.pdf]
